# Supplementary material for: Effects of Hangeshashinto on Growth of Oral Microorganisms
Source: Hindawi journal article supplement (doi:10.1155/2015/512947), 2015-01-01
Supplement: f1 [file 512947.f1.pdf]

**Supplementary Table 1** Bacterial strains and culture conditions

| Bacterial strain                                | Culture medium | Culture condition |
|-------------------------------------------------|----------------|-------------------|
| <b>Gram-negative Oral Bacteria</b>              |                |                   |
| <i>Aggregatibacter actinomycetemcomitans</i> Y4 | BHI H/M        | Capneic           |
| <i>Camphylobacter rectus</i> ATCC33238          | BHI NaCl       | Anaerobic         |
| <i>Capnocytophaga ochracea</i> ATCC27282        | BHI H/M        | Anaerobic         |
| <i>Fusobacterium nucleatum</i> ATCC25586        | BHI H/M        | Anaerobic         |
| <i>Porphyromonas gingivalis</i> ATCC33277       | BHI H/M        | Anaerobic         |
| <i>Porphyromonas gingivalis</i> 381             | BHI H/M        | Anaerobic         |
| <i>Porphyromonas endodontalis</i> ATCC35406     | BHI H/M        | Anaerobic         |
| <i>Prevotella intermedia</i> ATCC25611          | BHI H/M        | Anaerobic         |
| <i>Prevotella melaninogenica</i> ATCC25845      | BHI H/M        | Anaerobic         |
| <i>Tannerella forsythia</i> ATCC43037           | TF medium      | Anaerobic         |
| <i>Treponema denticola</i> ATCC35405            | GM-1           | Anaerobic         |
| <i>Veillonella parvula</i> ATCC17745            | BHI H/M        | Microaerobic      |
| <b>Gram-negative Bacteria</b>                   |                |                   |
| <i>Bacteroides thetaiotaomicron</i> JCM5827     | BHI H/M        | Anaerobic         |
| <i>Camphylobacter jejuni</i> ATCC29428          | BHI NaCl       | Microaerobic      |
| <i>Escherichia coli</i> K12                     | THB            | Aerobic           |
| <i>Porphyromonas asaccharolytica</i> JCM6326    | BHI H/M        | Anaerobic         |
| <b>Gram-positive Oral Bacteria</b>              |                |                   |
| <i>Actinomyces viscosus</i> ATCC19246           | THB            | Capneic           |
| <i>Enterococcus faecalis</i> 4532D              | THB            | Anaerobic         |
| <i>Lactobacillus casei</i> JCM1133              | THB            | Anaerobic         |
| <i>Streptococcus anginosus</i> IS57             | THB            | Anaerobic         |
| <i>Streptococcus gordonii</i> ATCC10558         | THB            | Anaerobic         |
| <i>Streptococcus mutans</i> 109c                | THB            | Anaerobic         |
| <i>Streptococcus salivarius</i> JCM5707         | THB            | Anaerobic         |
| <b>Gram-positive Bacteria</b>                   |                |                   |
| <i>Bacillus subtilis</i> ATCC9372               | BHI H/M        | Aerobic           |
| <i>Bifidobacterium longum</i> JCM1222           | THB            | Anaerobic         |
| <i>Staphyrococcus aureus</i> ATCC6738           | THB            | Aerobic           |
| <i>Streptococcus pyogenes</i> ATCC12348         | THB            | Anaerobic         |
| <b>Fungus</b>                                   |                |                   |
| <i>Candida albicans</i> JCM2085                 | BHI            | Aerobic           |

BHI H/M: brain-heart infusion broth with hemin (5 µg/ml) and menadione (5 µg/ml); GM-1: as described previously (Blakemore, 1976); TF medium: as described previously (Shimotahira, 2013); BHI NaCl: BHI containing 0.3% NaCl; THB: Todd Hewitt Broth. The anaerobic organisms were cultured anaerobically using an AnaeroPack-Anaero system (Mitsubishi Gas Chemical Company) at 37°C. The microaerobic organisms were cultured microaerobically using an AnaeroPack-MicroAero system at 37°C. The capneic organisms were cultured capneically using an AnaeroPack-CO2 system at 37°C.

**Supplementary Table 2** List of crude drugs and their purified extracts

| Crude drugs                        | Purified compound  | Reference      |
|------------------------------------|--------------------|----------------|
| <i>Scutellariae radix</i>          | Baicalin           | Kono, 2014     |
|                                    | Baicalein          | Kono, 2014     |
|                                    | Wogonin            | Kono, 2014     |
|                                    | Acteoside          | Xie, 2002      |
| <i>Coptidis rhizome</i>            | Berberine chloride | Kono, 2014     |
|                                    | Coptisine          | Kono, 2014     |
| <i>Zingiberis siccatum rhizoma</i> | [6]-Shogaol        | Kono, 2014     |
|                                    | [6]-Gingerol       | Kono, 2014     |
| <i>Glycyrrhizae radix</i>          | Liquiritin         | Kono, 2014     |
|                                    | Glycyrrhizic acid  | Kono, 2014     |
| <i>Ginseng radix</i>               | Ginsenoside Rg1    | Qian, 2009     |
|                                    | Ginsenoside Rb1    | Qian, 2009     |
| <i>Pinelliae tuber</i>             | Corymboside        | Wagner, 2011   |
|                                    | Homogentisic acid  | Hatano, 1991   |
| <i>Zizyphi fructus</i>             | Cyclic AMP         | Hanabusa, 1981 |

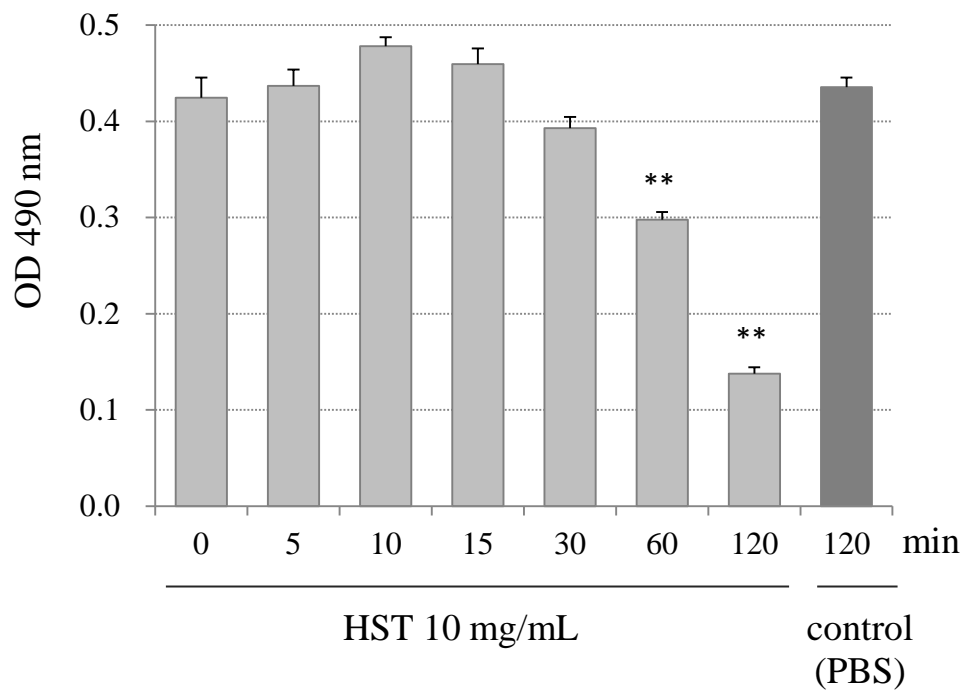

**Supplementary Figure 1** Viability of human oral keratinocytes. We seeded  $5 \times 10^3$  cells in 96-well plates and exposed them to 10 mg/ml HST extract for 0, 5, 10, 15, 30, 60, and 120 min. Cell viability was estimated by measuring MTS. Graph shows mean absorbance at 490 nm for the detection of MTS readings from a microplate reader. Error bars correspond to standard error. \*\* $P < 0.01$  vs. control by Dunnett's test.

## References

- Blakemore, R. P., E. Canale-Parola (1976). Arginine catabolism by *Treponema denticola*. *J bacteriology* 128:616-622.
- Shimotahira N, Oogai Y, Kawada-Matsuo M, Yamada S, Fukutsuji K, Nagano K, Yoshimura F, Noguchi K, Komatsuzawa H (2013). The surface layer of *Tannerella forsythia* contributes to serum resistance and oral bacterial coaggregation. *Infect Immun.* 81:1198-206.
- Xie LH, Wang X, Basnet P, Matsunaga N, Yamaji S, Yang DY, Cai SQ, Tani T (2002). Evaluation of variation of acteoside and three major flavonoids in wild and cultivated *Scutellaria baicalensis* roots by micellar electrokinetic chromatography. *Chem Pharm Bull.* 50:896-9.
- Qian ZM, Lu J, Gao QP, Li SP (2009). Rapid method for simultaneous determination of flavonoid, saponins and polyacetylenes in folium ginseng and radix ginseng by pressurized liquid extraction and high-performance liquid chromatography coupled with diode array detection and mass spectrometry. *J Chromatogr A.* 1216:3825-30.
- Wagner H, Bauer R, Melchart D, Xiao PG, Staudinger A (2011). *Rhizoma Pinelliae — Banxia : Chromatographic Fingerprint Analysis of Herbal Medicines*, Springer Vienna, pp 71-81 DOI: 10.1007/978-3-7091-0763-8\_7
- Hanabusa K, Cyong J, Takahashi M (1981). High-level of cyclic AMP in the jujube plum. *Planta Med.* 42:380-4.
- Hatano K, Shoyama Y, Nishioka I (1991). Cultivation studies on Clonally Propagated *Pinellia ternata*. *Shoyakugaku Zasshi* 45:203-205.
- Kono T, Kaneko A, Matsumoto C, Miyagi C, Ohbuchi K, Omiya Y, Mizuhara Y, Miyamo K, Uezono Y (2014). Multitargeted effect of hangeshashinto for treatment of chemotherapy-induced oral mucositis on inducible PGE2 production in human oral keratinocytes. *Integr Cancer Ther.* 13:435-45.
